# Supplementary material
Source: PubMed Central journal article supplement (PMC3775941)
Supplement: NIHMS443473-supplement-02.pdf [file NIHMS443473-supplement-02.pdf]

## **Supplementary material: Figure legends for supplementary figures**

**Supplementary Figure 1.** Preprocessing of the EEG (Panel A to C) and monitoring data (Panel D to G). Scalp and intracortical raw EEGs (Panel A) are transformed into individual spectrograms by applying Fast Fourier Transform (Panel B). Individual spectrograms were then transformed into grouped averages. Preparation of physiologic monitoring data included the following steps: extraction of the raw data for all monitoring values for a 60 minute time window surrounding depth seizure onset and removal of physiologically not plausible outliers (Panel D), normalization to individual patient averages for this window and representation as deltas from individual patient means (Panel E), outlier removal based on Chauvenet's criterion (Panel F), aggregation and presentation as mean and standard errors based on a bootstrap procedure (Panel G).

**Supplementary Figure 2.** Hourly microdialysis measurements between 3 hours before till 3 hours after seizure onset demonstrate no change in lactate, pyruvate, glucose, or LPR measurements.

**Supplementary Figure 3.** CT image (panel A-B bone and C-D brain windows) shows right frontal location of minidepth electrode. After removal of monitoring probes 3-T MRI images were obtained (the red circles indicate prior location of minidepth electrode and green circles location of EVD): very small areas of increased T2 signal on FLAIR (panel E-H) and gradient echo signal on susceptibility weighted imaging (panel I-L) can be seen.
