# Supplementary material
Source: PubMed Central journal article supplement (PMC3775941)

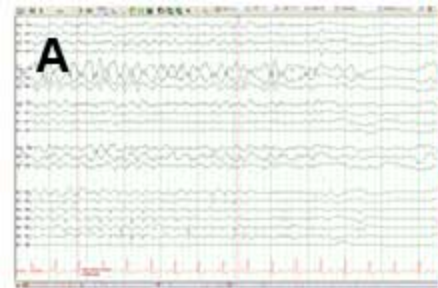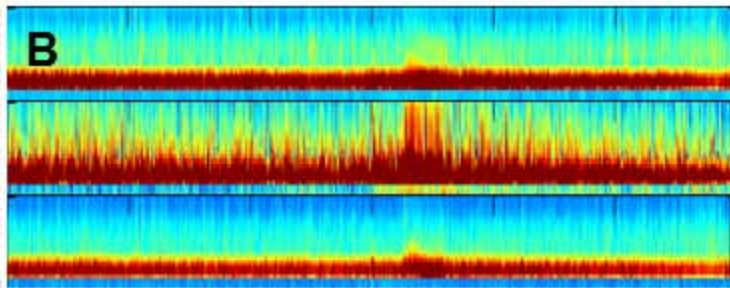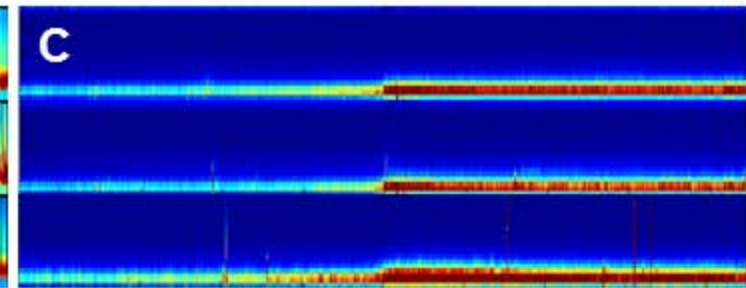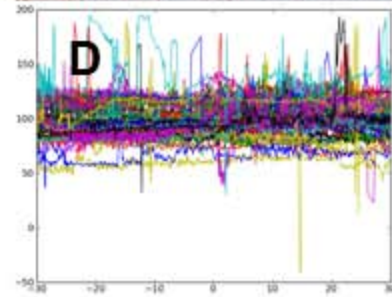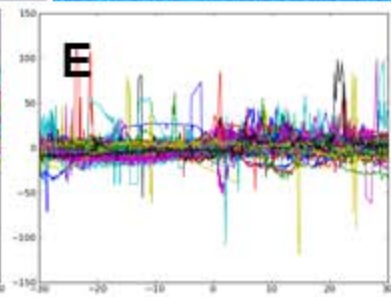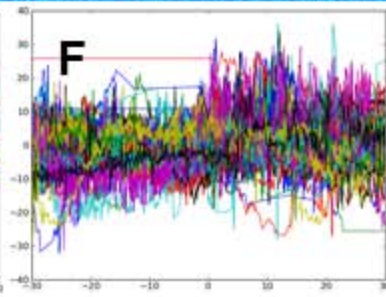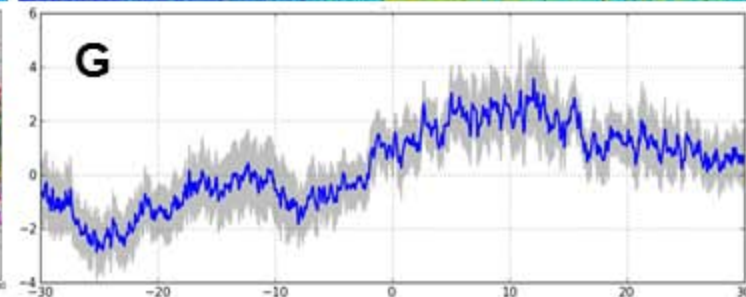

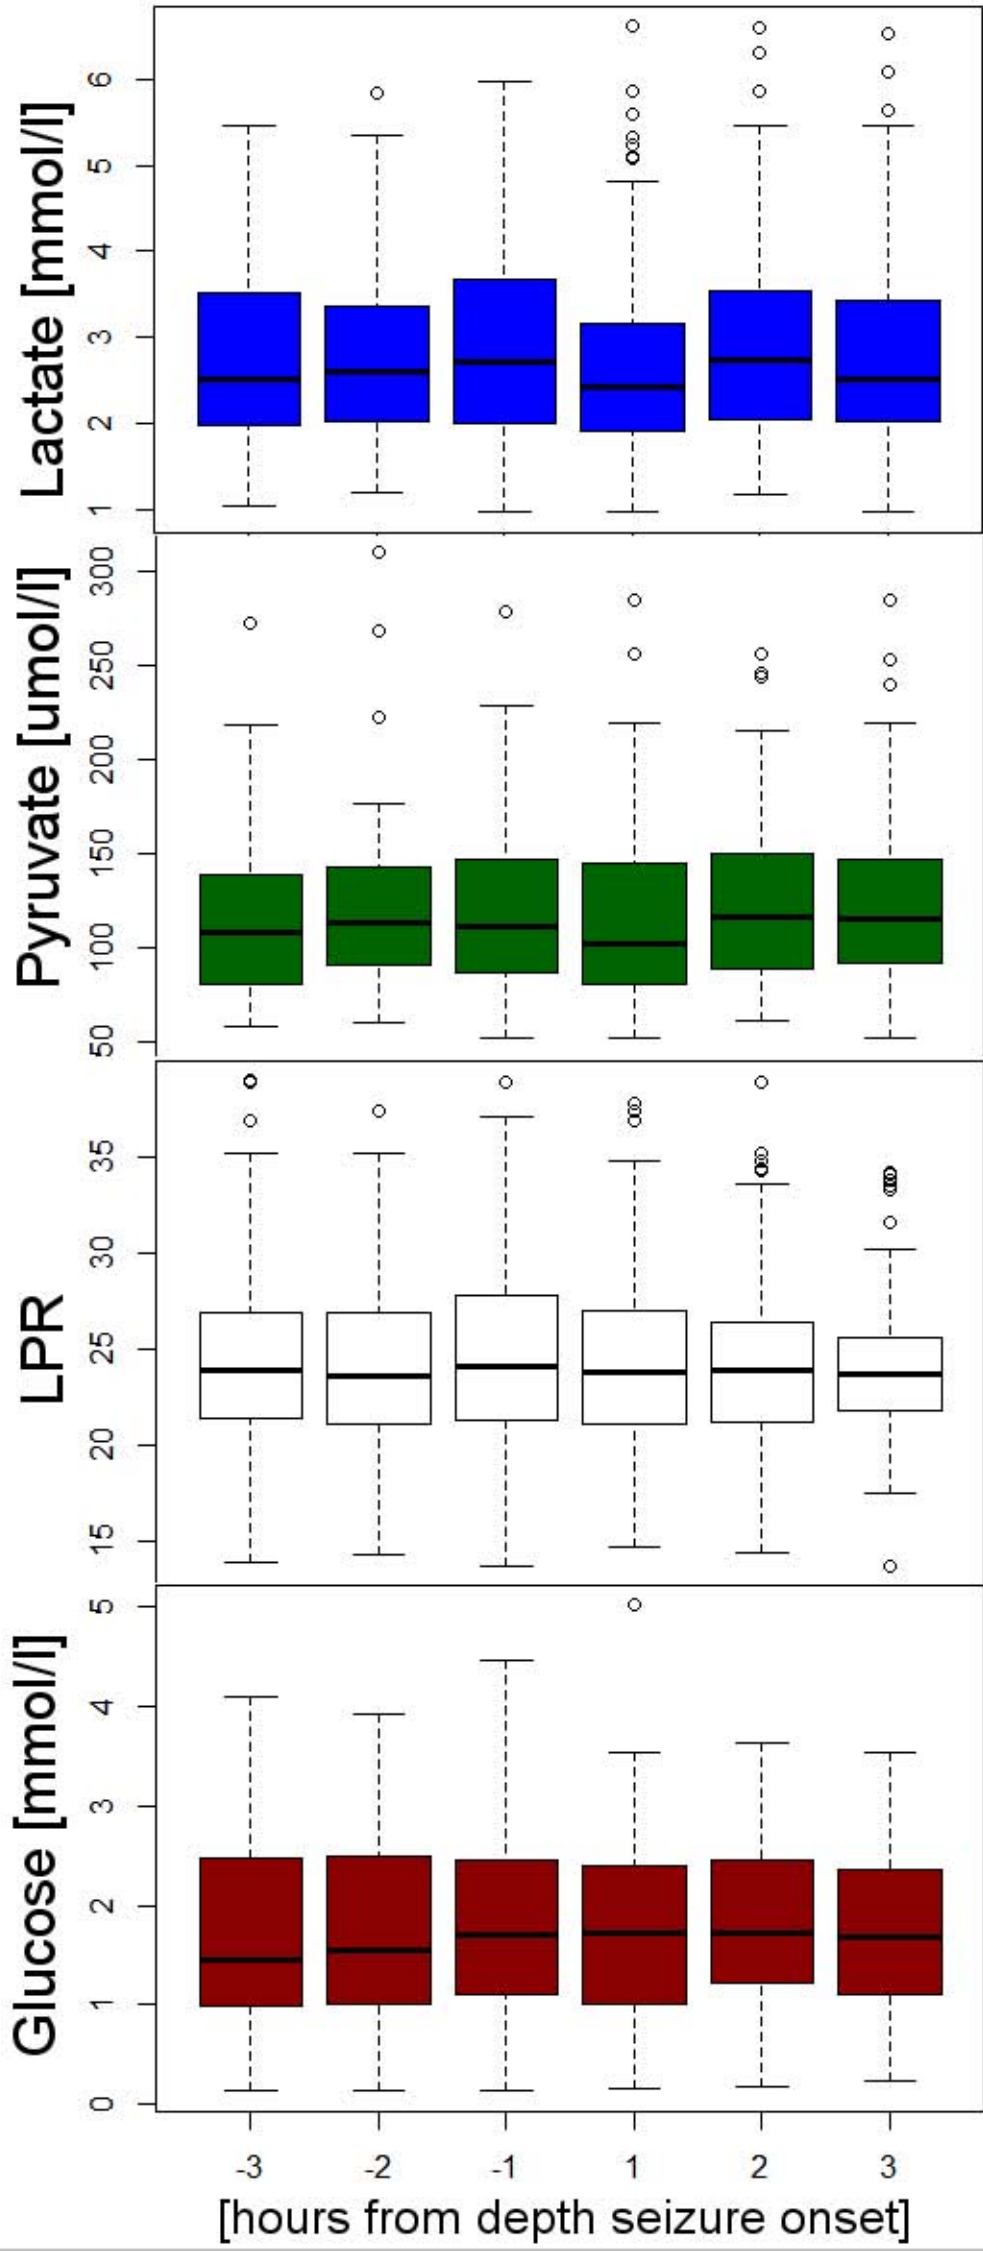

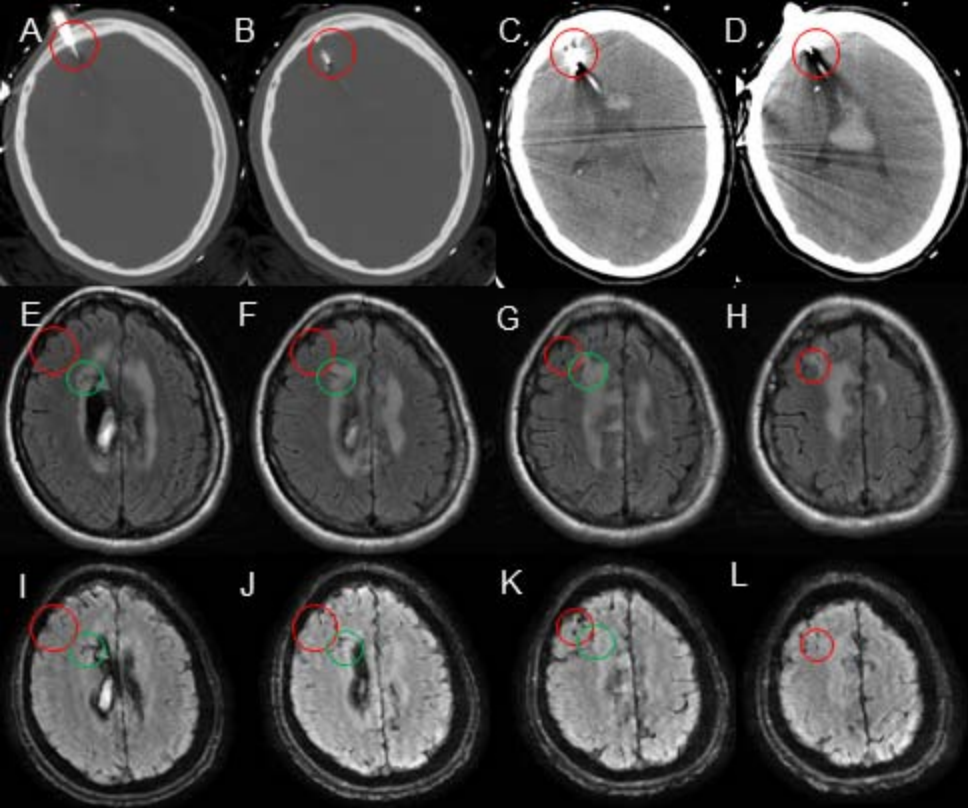

Supplement: NIHMS443473-supplement-Supp_Fig_S1-S3.pdf [file NIHMS443473-supplement-Supp_Fig_S1-S3.pdf]
